# Supplementary material for: Results of a multicenter, randomized trial examining a new transition model for post-kidney transplant adolescents
Source: Springer Nature journal article supplement (doi:10.1038/s41598-025-95845-7), 2025-04-03
Supplement: MOESM1 [file 41598_2025_95845_MOESM1_ESM.pdf]

## Supplementary Materials

### The TRANSNephro-study examining a new transition model for post-kidney transplant adolescents - Results of a multicenter, randomized-controlled trial

Martin Kreuzer<sup>1\*</sup>, Jenny Prüfe<sup>1\*</sup>, Marie-Luise Dierks<sup>2</sup>, Silvia Müther<sup>3</sup>, Dirk Bethe<sup>4</sup>, Anja Büscher<sup>1</sup>, Krisztina Heindl-Rusai<sup>5</sup>, Sabine Hollenbach<sup>6</sup>, Bernd Hoppe<sup>7</sup>, Ulrike John-Kroegel<sup>8</sup>, Nele K Kanzelmeyer<sup>9</sup>, Günter Klaus<sup>10</sup>, Birgitta Kranz<sup>11</sup>, Jun Oh<sup>12</sup>, Martin Pohl<sup>13</sup>, Susanne Rieger<sup>4</sup>, Bettina Ruckenbrodt<sup>14</sup>, Katja Sauerstein<sup>15</sup>, Hagen Staude<sup>16</sup>, Christina Taylan<sup>17</sup>, Julia Thumfart<sup>18</sup>, Marcus Weitz<sup>19</sup>, Rieke Ringlstetter<sup>20</sup>, Anika Großhennig<sup>20\*</sup>, Lars Pape<sup>1\*</sup> and the Study group of the German Society for Pediatric Nephrology

#### Supplementary Methods

##### *I. Definition of **per protocol population***

In the PP population, we included all patients that fulfill the following criteria:

- 1) Immunosuppressive agent trough levels available for at least 8 months before transition
- 2) Immunosuppressive agent trough levels available for at least 8 months after transition
- 3) Transition was implemented
- 4) No graft loss
- 5) No dialysis

##### *II. Statistical Methods for secondary endpoints*

- 1) eGFR was estimated as proposed by Schwartz et al. (Schwartz GJ, Schneider MF, Maier PS, Moxey-Mims M, Dharnidharka VR, Warady BA, Furth SL, Munoz A):

$$\text{eGFR} = 0.413 * \text{height (in cm)} / \text{Serum Creatinine (mg/dl)}$$

We used the height at randomization for all estimations of eGFR during the course of the study.

- 2) SF-12 [16]: To be able to evaluate the SF-12 questionnaire one item of the questionnaire had to be recoded because of an incorrect survey of Item "SOC2" (how

*often have your physical health or mental problem in the past four weeks affected your contacts with other people (visits to friends, relatives, etc.)?*) The variable in the SF12 questionnaire has originally five possible answers: 1- all of the time, 2- most of the time, 3- some of the time, 4- a little of the time, and 5- none of the time. Unfortunately, the questionnaire used in the study had one answer option too many. Besides the five answer options described, the option “a good bit of a time” was also surveyed. Since a pre-defined code from the SF12 manual was used to evaluate the SF12 questionnaire, deviations in the variables were not possible. We recoded the variable so that all answers that were “most of the time” and “a good bit of a time” were summarized into “most of the time”.

## Supplementary Results

Supplementary Table 1. Baseline characteristics of the ITT population

|                                 | ITT                             |                                 |         |
|---------------------------------|---------------------------------|---------------------------------|---------|
|                                 | Intervention                    | Control                         | p-Value |
| <b>n</b>                        | 49                              | 53                              |         |
| <b>Gender, male (%)</b>         | 29 (59.2%)                      | 27 (50.9%)                      | 0.4034  |
| <b>Age, years</b>               | 17.8 ± 1.7<br>(17 / 16-23)      | 17.6 ± 1.5<br>(17 / 15-22)      | 0.5117  |
| <b>Height, cm</b>               | 166.1 ± 11.8<br>(168 / 130-185) | 166.2 ± 10.0<br>(166 / 130-186) | 0.9510  |
| <b>Time since Tx, years</b>     | 7.6 ± 4.7<br>(7/ 0-15)          | 5.8 ± 4.7<br>(5/ 0-17)          | 0.0592  |
| <b>Randomization stratum</b>    |                                 |                                 | 0.3706  |
| 1 (male, time since Tx < 5 y)   | 10 (20.4%)                      | 14 (26.4%)                      |         |
| 2 (male, time since Tx ≥ 5 y)   | 19 (38.8%)                      | 13 (24.5%)                      |         |
| 3 (female, time since Tx < 5 y) | 9 (18.4%)                       | 15 (28.3%)                      |         |
| 4 (female, time since Tx ≥ 5 y) | 11 (22.5%)                      | 11 (20.8%)                      |         |

Supplementary Table 2: Sensitivity analyses for primary and secondary endpoints

| Model                                 |                                                             | Population   | LSMean       | LSMean  | p-value |
|---------------------------------------|-------------------------------------------------------------|--------------|--------------|---------|---------|
| Dependent                             | Adjustment                                                  |              | Intervention | Control |         |
| Variation coefficient of trough level | -                                                           | ITT (n = 81) | 0.35         | 0.34    | 0.8327  |
|                                       | Randomization stratum                                       | ITT (n = 81) | 0.36         | 0.33    | 0.6470  |
|                                       | Randomization stratum, study site (according primary model) | ITT (n = 81) | 0.31         | 0.29    | 0.8265  |
|                                       | -                                                           | PP (n = 60)  | 0.40         | 0.37    | 0.6998  |
|                                       | Randomization stratum                                       | PP (n = 60)  | 0.39         | 0.36    | 0.6561  |
|                                       | Randomization stratum, study site (according primary model) | PP (n = 60)  | 0.32         | 0.32    | 0.9426  |
|                                       | -                                                           | ITT (n = 65) | 45.37        | 52.66   | 0.1663  |

|                                                 |                       |              |       |       |        |
|-------------------------------------------------|-----------------------|--------------|-------|-------|--------|
| Mean eGFR at adult hospital phase               | Randomization stratum | ITT (n = 65) | 47.07 | 52.67 | 0.2713 |
|                                                 | -                     | PP (n = 57)  | 48.4  | 55.9  | 0.1410 |
|                                                 | Randomization stratum | PP (n = 57)  | 50.41 | 55.75 | 0.2537 |
| SF-12 physical subscale at adult hospital phase | -                     | ITT (n = 35) | 41.09 | 42.00 | 0.4996 |
|                                                 | Randomization stratum | ITT (n = 35) | 41.15 | 42.09 | 0.5013 |
|                                                 | -                     | PP (n = 28)  | 41.84 | 41.63 | 0.8753 |
|                                                 | Randomization stratum | PP (n = 28)  | 41.63 | 41.65 | 0.9907 |
| SF-12 mental subscale at adult hospital phase   | -                     | ITT (n = 35) | 44.16 | 43.91 | 0.9057 |
|                                                 | Randomization stratum | ITT (n = 35) | 43.64 | 43.78 | 0.9482 |
|                                                 | -                     | PP (n = 28)  | 44.57 | 42.98 | 0.5018 |
|                                                 | Randomization stratum | PP (n = 28)  | 44.18 | 42.92 | 0.6217 |

## Supplementary Figures

Boxplots of continuous outcome data during the course of the study

Supplementary Figure 1: Boxplots on CoV for mITT (A) and PP (B)

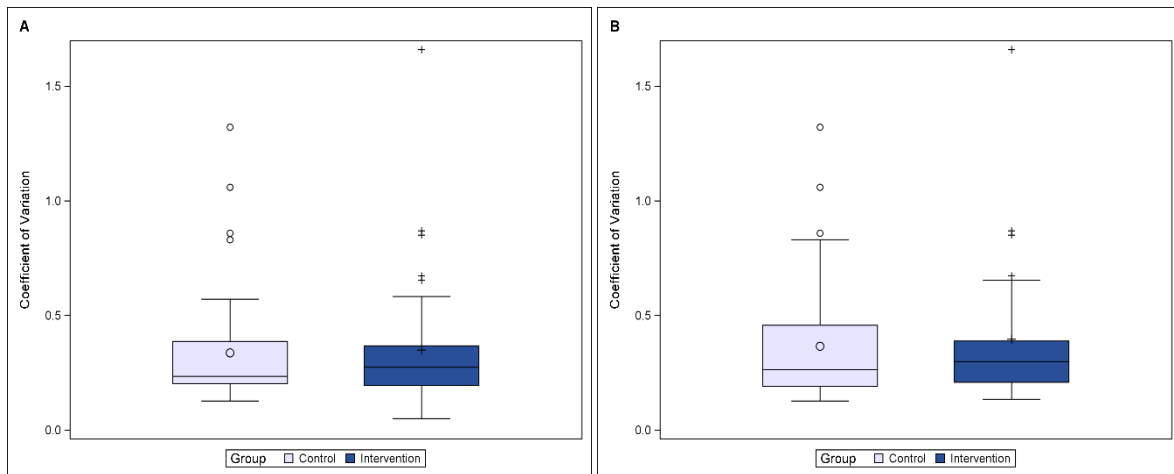

CoV – coefficient of variation of immuno-suppressant trough level

Supplementary Figure 2: Boxplots on mean eGFR for mITT (A) and PP (B)

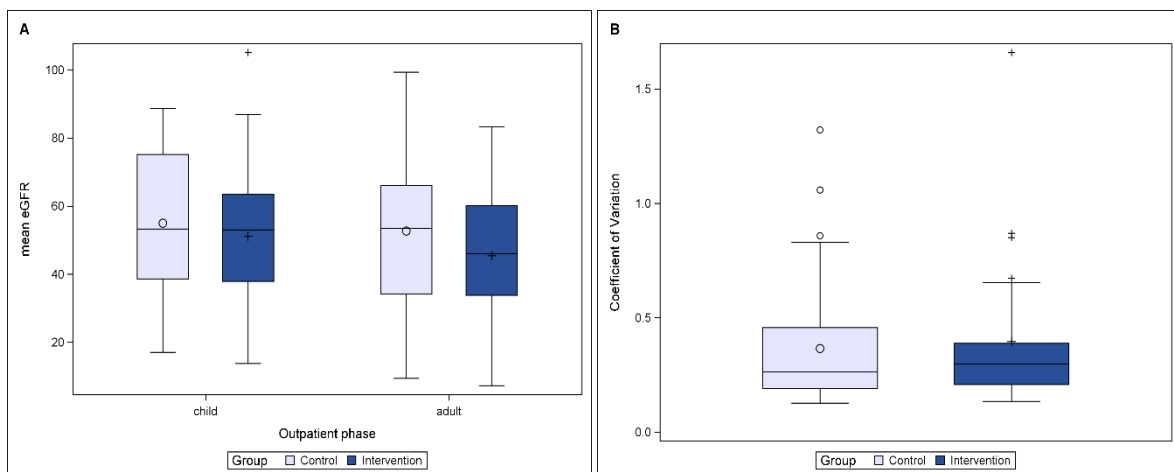

eGFR – estimated glomerular filtration rate

Supplementary Figure 2: Boxplots on SF-12 (all available data is depicted) for the physical scale (A) and the mental scale (B)

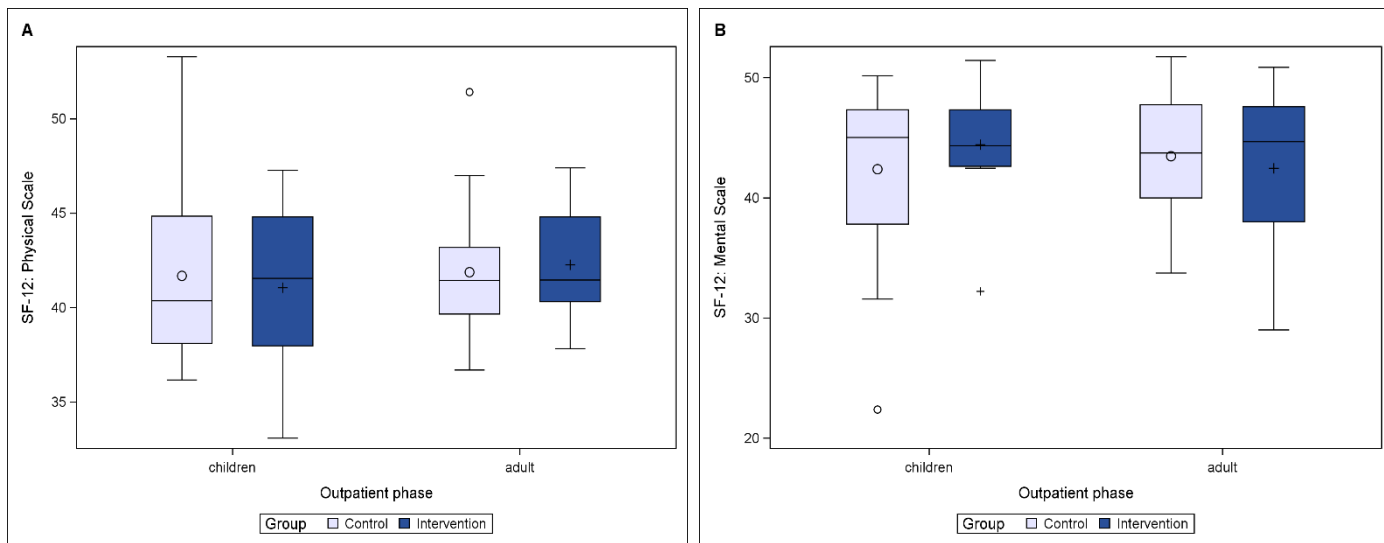

SF-12 – Short form-12 questionnaire
